# Supplementary material for: Positive selection affects the human ADLH2 gene expression: genetic adaptation to alcohol consumption
Source: Research Square preprint supplement (doi:10.21203/rs.3.rs-891422/v1), 2021-09-13
Supplement: Supplementary file 1 [file 77a17af25bb7047bd334b1f0.xlsx]

## Sheet: Sheet1
Supplementary Table S9. Reported trait(s) and association counts with SNPs under positive selection. Data were obtained from the NHGRI-EBI Catalog of human genome-wide association studies.
Trait label(s)	Reported trait(s)	Association count with rs3184504		Trait label(s)	Reported trait(s)	Association count with rs4766578		Trait label(s)	Reported trait(s)	Association count with rs10774625		Trait label(s)	Reported trait(s)	Association count with rs597808		Trait label(s)	Reported trait(s)	Association count with rs653178		Trait label(s)	Reported trait(s)	Association count with rs2013002
diastolic blood pressure	Diastolic blood pressure	12		reticulocyte count	High light scatter reticulocyte count, High light scatter reticulocyte percentage of red cells, Immature fraction of reticulocytes, Reticulocyte fraction of red cells	4		urate measurement	Urate levels	4		hematocrit	Hematocrit	2		diastolic blood pressure	Diastolic blood pressure	4		alcohol drinking, mean arterial pressure	Mean arterial pressure x alcohol consumption interaction (2df test)	2
systolic blood pressure	Systolic blood pressure	5		coronary artery disease	Coronary artery disease	2		systemic lupus erythematosus	Systemic lupus erythematosus	2		low density lipoprotein cholesterol measurement	LDL cholesterol levels, Low density lipoprotein cholesterol levels	2		urate measurement	Urate levels	3		alcohol drinking, diastolic blood pressure	Diastolic blood pressure x alcohol consumption interaction (2df test)	1
hemoglobin measurement	Hemoglobin levels, Hemoglobin, Red blood cell traits, Hemoglobin concentration	5		smoking initiation	Smoking initiation (ever regular vs never regular), Smoking initiation	2		eye measurement	Retinal vascular caliber	1		mean corpuscular hemoglobin concentration	Hemoglobin concentration	2		celiac disease	Celiac disease	2		alcohol drinking, systolic blood pressure	Systolic blood pressure x alcohol consumption interaction (2df test)	1
platelet count	Platelet count	5		vitiligo	Vitiligo	1		hypothyroidism	Hypothyroidism	1		smoking behavior	Smoking status (ever vs never smokers)	1		mean arterial pressure	Blood pressure, Mean arterial pressure	2		alcohol consumption measurement, diastolic blood pressure	Diastolic blood pressure x alcohol consumption (light vs heavy) interaction (2df test)	1
coronary artery disease	Coronary heart disease, Coronary artery disease	4		heart failure	Heart failure	1		hypertension	Hypertension	1		allergic rhinitis	Allergic rhinitis	1		inflammatory bowel disease	Inflammatory bowel disease	2
neutrophil count	Neutrophil count	4		birth weight	Birth weight	1		left ventricular structural measurement	Left ventricle diastolic internal dimension	1		systemic lupus erythematosus	Systemic lupus erythematosus	1		crohn's disease	Crohn's disease	2
eosinophil count	Eosinophil counts, White blood cell count (eosinophil)	3		Sjogren syndrome	Sjögren's syndrome	1		HbA1c measurement	Glycated hemoglobin levels	1		alcohol drinking, systolic blood pressure	Systolic blood pressure x alcohol consumption interaction (2df test)	1		low density lipoprotein cholesterol measurement	LDL cholesterol, Low density lipoprotein cholesterol levels	2
basophil count	Basophil count	3		reaction time measurement	Reaction time	1		coronary artery disease	Coronary artery disease (myocardial infarction, percutaneous transluminal coronary angioplasty, coronary artery bypass grafting, angina or chromic ischemic heart disease)	1		alcohol drinking, diastolic blood pressure	Diastolic blood pressure x alcohol consumption interaction (2df test)	1		total cholesterol measurement	Total cholesterol levels	2
erythrocyte count	Red blood cell count	3		smoking status measurement	Smoking status (ever vs never smokers)	1		glomerular filtration rate	Estimated glomerular filtration rate	1		age at onset, allergy	Allergic disease (asthma, hay fever and/or eczema) (age of onset)	1		bilirubin measurement	Direct bilirubin levels, Total bilirubin levels	2
reticulocyte count	Reticulocyte count, High light scatter reticulocyte count	3		tumor necrosis factor receptor II measurement	Tumor necrosis factor receptor 2 levels	1		parental longevity	Parental longevity (father's age at death or father's attained age)	1		allergy	Allergic disease (asthma, hay fever and/or eczema) (multivariate analysis)	1		thyroid peroxidase antibody measurement	Thyroid peroxidase antibody positivity, Thyroid peroxidase antibody levels	2
myeloid white cell count	Myeloid white cell count, White blood cell count	3		high density lipoprotein cholesterol measurement	HDL cholesterol	1		myocardial infarction	Myocardial infarction	1		colorectal cancer	Colorectal cancer	1		cystatin c measurement, chronic kidney disease	Chronic kidney disease	1
high density lipoprotein cholesterol measurement	High density lipoprotein cholesterol levels, HDL cholesterol levels	3		juvenile idiopathic arthritis	Arthritis (juvenile idiopathic)	1		childhood onset asthma	Asthma (childhood onset)	1		mean corpuscular hemoglobin	Mean corpuscular hemoglobin	1		immune system disease	Celiac disease or Rheumatoid arthritis	1
reticulocyte measurement	Immature fraction of reticulocytes, High light scatter reticulocyte percentage of red cells, Reticulocyte fraction of red cells	3						asthma	Asthma (age of onset)	1		waist-hip ratio	Waist-hip ratio	1		eosinophil count	Eosinophil counts	1
monocyte count	Monocyte count	3						body mass index, systolic blood pressure	Body mass index and systole blood pressure (pairwise)	1		apolipoprotein B measurement	Apolipoprotein B levels	1		allergic rhinitis, Eczema	Hay fever and/or eczema	1
leukocyte count	White blood cell count	3						body mass index, coronary artery disease	Body mass index and coronary artery disease (pairwise)	1		gastroesophageal reflux disease	Gastroesophageal reflux disease	1		allergic rhinitis, asthma, Eczema	Allergic disease (asthma, hay fever or eczema)	1
colorectal cancer	Colorectal cancer	3						mean corpuscular volume	Mean spheric corpuscular volume	1		colorectal adenoma, colorectal cancer	Colorectal cancer or advanced adenoma	1		eosinophil count, basophil count	Sum eosinophil basophil counts	1
small vessel stroke	Small vessel stroke (CCSp classification), Small vessel stroke (CCS or TOAST classification), Ischemic stroke (small-vessel)	3						body mass index, high density lipoprotein cholesterol measurement	Body mass index and HDL-C (pairwise)	1		hypothyroidism	Hypothyroidism	1		eosinophil percentage of leukocytes	Eosinophil percentage of white cells	1
appendicular lean mass	Appendicular lean mass	3														neutrophil percentage of granulocytes	Neutrophil percentage of granulocytes	1
type i diabetes mellitus	Type 1 diabetes	2														eosinophil percentage of granulocytes	Eosinophil percentage of granulocytes	1
hypothyroidism	Hypothyroidism	2														tonsillectomy risk measurement	Tonsillectomy	1
hematocrit	Hematocrit	2														type i diabetes mellitus	Type 1 diabetes	1
platelet crit	Plateletcrit	2														asthma	Asthma	1
tonsillectomy risk measurement	Tonsillectomy	2														lymphocyte count	Lymphocyte counts	1
blood protein measurement	Blood protein levels	2														lymphocyte percentage of leukocytes	Lymphocyte percentage of white cells	1
lymphocyte count	Lymphocyte counts	2														systemic lupus erythematosus	Systemic lupus erythematosus	1
sclerosing cholangitis	Primary sclerosing cholangitis	2														serum alanine aminotransferase measurement	Alanine aminotransferase levels	1
total cholesterol measurement	Total cholesterol levels	2														serum albumin measurement	Serum albumin level	1
celiac disease	Celiac disease	2														neutrophil percentage of leukocytes	Neutrophil percentage of white cells	1
stroke	Stroke	2														alkaline phosphatase measurement	Serum alkaline phosphatase levels	1
body mass index	Body mass index	2														aspartate aminotransferase to alanine aminotransferase ratio	Aspartate aminotransferase to alanine aminotransferase ratio	1
serum alanine aminotransferase measurement	Liver enzyme levels (alanine transaminase), Alanine aminotransferase levels	2														cystatin c measurement	Cystatin C levels	1
squamous cell lung carcinoma, breast carcinoma, colorectal cancer, estrogen-receptor negative breast cancer, lung adenocarcinoma, lung carcinoma, ovarian carcinoma, ovarian endometrioid carcinoma, ovarian serous carcinoma, prostate carcinoma	Cancer (pleiotropy), Cancer	2														apolipoprotein B measurement	Apolipoprotein B levels	1
low density lipoprotein cholesterol measurement	Low density lipoprotein cholesterol levels	2														apolipoprotein a 1 measurement	Apolipoprotein A1 levels	1
Ischemic stroke	Ischemic stroke	2														aspartate aminotransferase measurement	Aspartate aminotransferase levels	1
endometrial carcinoma	Endometrial cancer (endometrioid histology), Endometrial cancer	2														HbA1c measurement	Glycated hemoglobin levels	1
colorectal cancer, endometrial neoplasm	Colorectal or endometrial cancer	1														high density lipoprotein cholesterol measurement	High density lipoprotein cholesterol levels	1
inflammatory bowel disease	Inflammatory bowel disease	1														serum non-albumin protein measurement	Non-albumin protein levels	1
ankylosing spondylitis, crohn's disease, psoriasis, sclerosing cholangitis, ulcerative colitis	Chronic inflammatory diseases (ankylosing spondylitis, Crohn's disease, psoriasis, primary sclerosing cholangitis, ulcerative colitis) (pleiotropy)	1														blood phosphate measurement	Serum phosphate levels	1
apolipoprotein a 1 measurement	Apolipoprotein A1 levels	1														blood protein measurement	Serum total protein level	1
glaucoma	Glaucoma (multi-trait analysis)	1														Eczema	Eczema	1
autoantibody measurement, event free survival time, type i diabetes mellitus	Type 1 diabetes autoantibodies in high risk HLA genotype individuals (time to event)	1														myocardial infarction	Myocardial infarction	1
multiple sclerosis	Multiple sclerosis	1														peripheral arterial disease	Peripheral artery disease	1
diastolic blood pressure, smoking status measurement	Diastolic blood pressure (cigarette smoking interaction)	1														monocyte count	Monocyte count	1
basophil count, neutrophil count	Sum basophil neutrophil counts	1														sarcoidosis	Sarcoidosis	1
fibrinogen measurement	Fibrinogen levels	1														alopecia areata	Alopecia areata	1
smoking status measurement, systolic blood pressure	Systolic blood pressure (cigarette smoking interaction)	1														psoriasis, type ii diabetes mellitus	Psoriasis or type 2 diabetes (trans-disease meta-analysis)	1
parental longevity	Parental longevity (father's age at death)	1
serum IgA measurement	IgA levels	1
left ventricular diastolic function measurement	Left ventricular end-diastolic volume	1
left ventricular systolic function measurement	Left ventricular end-systolic volume	1
autoimmune thyroid disease	Autoimmune thyroid disease	1
thyroid stimulating hormone measurement	Thyroid stimulating hormone levels	1
birth weight, parental genotype effect measurement	Offspring birth weight	1
birth weight	Birth weight	1
type ii diabetes mellitus	Type 1 diabetes	1
Thyroid preparation use measurement	Medication use (thyroid preparations)	1
Calcium channel blocker use measurement	Medication use (calcium channel blockers)	1
C-C motif chemokine 3 measurement	C-C motif chemokine 3 levels	1
body height	Height	1
beta-2 microglobulin measurement	Beta-2 microglubulin plasma levels	1
cardiovascular disease	Cardiovascular disease	1
eosinophil count, neutrophil count	Sum neutrophil eosinophil counts	1
granulocyte count	Granulocyte count	1
Autoimmune Hepatitis	Autoimmune hepatitis type-1	1
blood metabolite measurement	Blood metabolite levels	1
rheumatoid arthritis	Rheumatoid arthritis	1
intraocular pressure measurement	Intraocular pressure	1
large artery stroke	Ischemic stroke (large artery atherosclerosis)	1
tumor necrosis factor measurement	Tumor necrosis factor levels	1
latent autoimmune diabetes in adults, type ii diabetes mellitus	Latent autoimmune diabetes vs. type 2 diabetes	1
aspartate aminotransferase measurement	Aspartate aminotransferase levels	1
